# Supplementary material for: Species traits and network structure predict the success and impacts of pollinator invasions
Source: PubMed Central journal article supplement (PMC5981428; doi:10.1038/s41467-018-04593-y), 2018-05-31
Supplement: 41467_2018_4593_MOESM1_ESM.pdf [file 41467_2018_4593_MOESM1_ESM.pdf]

Supporting Information for

Species traits and network structure predict the success and impacts of  
pollinator invasions

Fernanda S. Valdovinos\*, Eric L. Berlow, Pablo Moisset de Espanés, Rodrigo Ramos-  
Jiliberto, Diego P. Vázquez & Neo D. Martinez

\*Correspondence to: [fsvaldov@umich.edu](mailto:fsvaldov@umich.edu)

Supplementary Information includes:

Supplementary Fig. 1. Alien abundance increases with aliens' number of interactions more in low than high mortality scenarios for efficient but not for average foragers.

Supplementary Table 1. Model parameters and state-variables.

Supplementary Table 2. CART analysis results of the effect of efficient alien foragers on natives for all data.

Supplementary Table 3. CART analysis results of the effect of efficient alien foragers on natives for pollinators' high mortality rate

Supplementary Table 4. Full description and results of our Generalized Linear Models.

**Supplementary Fig. 1. Alien abundance increases with aliens' number of interactions more in low than high mortality scenarios for efficient but not for average foragers.**

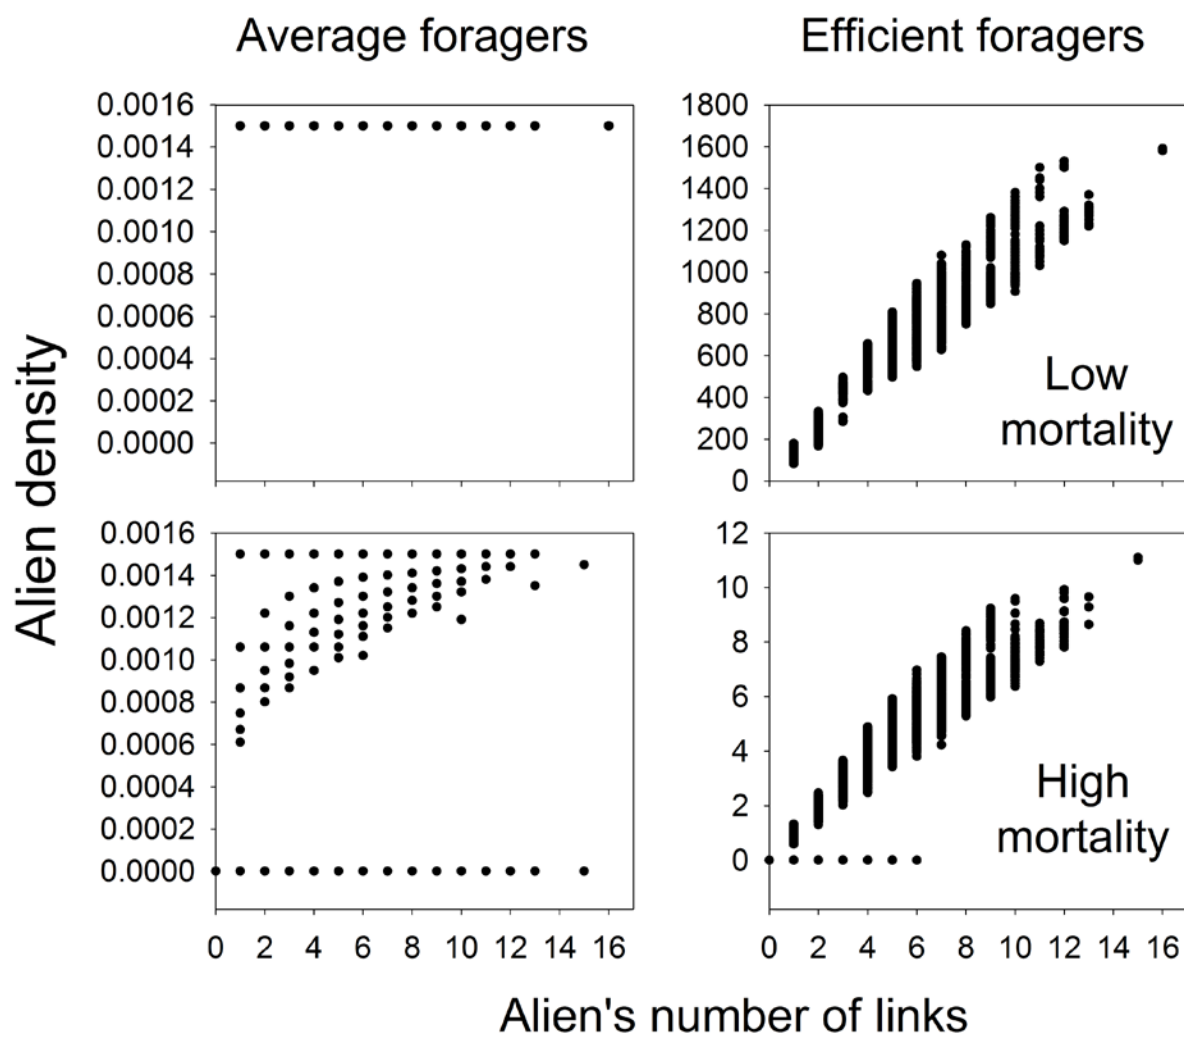

**Supplementary Table 1. Model parameters and state-variables**

| Definition                                                                | Symbol      | Dimension                                                                             | Mean value      |
|---------------------------------------------------------------------------|-------------|---------------------------------------------------------------------------------------|-----------------|
| Density of plant population i                                             | $p_i$       | individuals area <sup>-1</sup>                                                        | 0.5*            |
| Density of animal population j                                            | $a_j$       | individuals area <sup>-1</sup>                                                        | 0.5*            |
| Total density of floral resources of plant population i                   | $R_i$       | mass area <sup>-1</sup>                                                               | 0.5*            |
| Foraging effort                                                           | $a_{ij}$    | None                                                                                  | 1 / $k_{aj}$ *  |
| Visitation efficiency                                                     | $\tau_{ij}$ | visits area time <sup>-1</sup><br>individuals <sup>-1</sup> individuals <sup>-1</sup> | 1               |
| Expected number of seeds produced by a pollination event                  | $e_{ij}$    | individuals visits <sup>-1</sup>                                                      | 0.8             |
| Per capita mortality rate of plants                                       | $\mu_i^P$   | time <sup>-1</sup>                                                                    | 0.001           |
| Conversion efficiency of floral resources to pollinator births            | $c_{ij}$    | individuals mass <sup>-1</sup>                                                        | 0.2             |
| Per capita mortality rate of pollinators                                  | $\mu_j^A$   | time <sup>-1</sup>                                                                    | 0.05/<br>0.001* |
| Pollinator extraction efficiency of resource in each visit (linear model) | $b_{ij}$    | individuals visits <sup>-1</sup>                                                      | 0.4             |
| Maximum fraction of total seeds that recruit to plants                    | $g_i$       | None                                                                                  | 0.4             |
| Inter-specific competition coefficient of plants                          | $u_i$       | area individuals <sup>-1</sup>                                                        | 0.06            |
| Intra-specific competition coefficient of plants                          | $w_i$       | area individuals <sup>-1</sup>                                                        | 1.2             |
| Production rate of floral resources                                       | $\beta_i$   | mass individuals <sup>-1</sup> time <sup>-1</sup>                                     | 0.2             |
| Self-limitation parameter of resource production                          | $\phi_{ij}$ | time <sup>-1</sup>                                                                    | 0.04            |
| Adaptation rate of foraging efforts of pollinators                        | $G_j$       | None                                                                                  | 2               |

Values were drawn from a uniform random distribution with the specified mean, and variances of 10% and 0% of means for plants' and animals' parameters, respectively. Asterisks indicate initial conditions,  $k_{aj}$  is the number of interactions of animal  $j$  and the two values of animal mortality rate used, the highest for animal introductions and the lowest for plant introductions.

**Supplementary Table 2. Classification and Regression Tree (CART, n=21,600) analysis of the density and effects on natives of ‘efficient foragers’ as a function of 30 properties of networks and alien pollinator species.**

|                               | <b>Alien density</b>                                                          | <b>Pollinators’ persistence</b>                                                                                                           | <b>Pollinators’ density</b>                    | <b>Plants’ density</b>                                               | <b>Total floral resources</b>                  | <b>Resource consumption by pollinators</b>                                                                                                |
|-------------------------------|-------------------------------------------------------------------------------|-------------------------------------------------------------------------------------------------------------------------------------------|------------------------------------------------|----------------------------------------------------------------------|------------------------------------------------|-------------------------------------------------------------------------------------------------------------------------------------------|
| <b>5-folded R<sup>2</sup></b> | 0.99                                                                          | 0.89                                                                                                                                      | 0.99                                           | 0.75                                                                 | 0.93                                           | 0.89                                                                                                                                      |
| <b>Main Contributors</b>      | Pollinators’ mortality: 61%<br>Fraction of plant sp visited by the alien: 37% | Alien’s mean Jaccardian index: 62%<br>Connectivity of the most generalist plant sp: 13%<br>Fraction of plant sp visited by the alien: 11% | Fraction of plant sp visited by the alien: 99% | Alien density: 68%<br>Fraction of specialist native pollinators: 16% | Fraction of plant sp visited by the alien: 99% | Alien’s mean Jaccardian index: 61%<br>Connectivity of the most generalist plant sp: 13%<br>Fraction of plant sp visited by the alien: 12% |

Separated analyses were conducted for each of the 6 continuous outcomes (i.e., density of the aliens and their effects on the persistence and density of native pollinators, the density and total floral resources of native plants, and the resource consumption by native pollinators). Alien density was added to the CART analyses of the 5 types of aliens’ effects on natives. Main contributors displayed include only factors that account for >5% of the variance within the 21,600 introductions of efficient foragers.

**Supplementary Table 3. Classification and Regression Tree (CART, n=10,800) analysis of the density and effects on natives of ‘efficient foragers’ in a ‘high mortality scenario’ as a function of 30 properties of networks and alien pollinator species.**

|                               | <b>Alien density</b>    | <b>Pollinators’ persistence</b>                                                                                                           | <b>Pollinators’ density</b>                    | <b>Plants’ density</b>                                               | <b>Total floral resources</b>                  | <b>Resource consumption by pollinators</b>                                                                                                |
|-------------------------------|-------------------------|-------------------------------------------------------------------------------------------------------------------------------------------|------------------------------------------------|----------------------------------------------------------------------|------------------------------------------------|-------------------------------------------------------------------------------------------------------------------------------------------|
| <b>5-folded R<sup>2</sup></b> | 0.97                    | 0.85                                                                                                                                      | 0.98                                           | 0.82                                                                 | 0.93                                           | 0.85                                                                                                                                      |
| <b>Main Contributors</b>      | Alien’s # links:<br>94% | Alien’s mean Jaccardian index: 63%<br>Connectivity of the most generalist plant sp: 13%<br>Fraction of plant sp visited by the alien: 12% | Fraction of plant sp visited by the alien: 99% | Alien density: 60%<br>Fraction of specialist native pollinators: 19% | Fraction of plant sp visited by the alien: 99% | Alien’s mean Jaccardian index: 63%<br>Connectivity of the most generalist plant sp: 13%<br>Fraction of plant sp visited by the alien: 12% |

Separated analyses were conducted for each of the 6 continuous outcomes (i.e., density of the aliens and their effects on the persistence and density of native pollinators, the density and total floral resources of native plants, and the resource consumption by native pollinators). Alien density was added to the CART analyses of the 5 types of aliens’ effects on natives. Main contributors displayed include only factors that account for >5% of the variance within the 10,800 introductions of efficient foragers for high pollinators’ mortality.

**Supplementary Table 4. Generalized Linear Models predicting the effect of alien pollinators on native species**

|                                                                                                                                                                                             | Estimate | Std. Error | t-value | Pr(> t ) |     |
|---------------------------------------------------------------------------------------------------------------------------------------------------------------------------------------------|----------|------------|---------|----------|-----|
| <i>Alien effect on pollinators' persistence (AIC: -5153.8, Null/ Residual deviance: 4.89/ 0.93 on 1199/1185 degrees of freedom. Dispersion parameter for gaussian family: 0.00079)</i>      |          |            |         |          |     |
| (Intercept)                                                                                                                                                                                 | -0.11    | 0.03       | -3.40   | 0.0006   | *** |
| Alien foraging efficiency                                                                                                                                                                   | 0.04     | 0.02       | 2.46    | 0.014    | *   |
| Alien mean Jaccardian index                                                                                                                                                                 | 1.52     | 0.45       | 3.37    | 2 e-14   | *** |
| Connectivity of most generalist plant sp                                                                                                                                                    | 0.014    | 0.003      | 4.56    | 5 e-6    | *** |
| Fraction of plant sp visited by alien                                                                                                                                                       | 0.10     | 0.07       | 1.5     | 0.13     |     |
| Alien foraging efficiency * Alien mean Jaccardian                                                                                                                                           | -1.14    | 0.25       | -4.63   | 4e-6     | *** |
| Alien foraging efficiency * Connectivity of most generalist plant sp                                                                                                                        | -0.007   | 0.002      | -4.31   | 2 e-5    | *** |
| Alien foraging efficiency * Fraction of plant sp visited by alien                                                                                                                           | 0.20     | 0.03       | 6.56    | 8 e-11   | *** |
| Alien mean Jaccardian * Connectivity of most generalist plant sp                                                                                                                            | -0.14    | 0.05       | -2.64   | 0.009    | **  |
| Alien mean Jaccardian * Fraction of plant sp visited by alien                                                                                                                               | -0.75    | 1.02       | -0.73   | 0.46     |     |
| Connectivity of most generalist plant sp * Fraction of plant sp visited by alien                                                                                                            | -0.036   | 0.006      | -6.27   | 5 e-10   | *** |
| Alien foraging efficiency * Alien mean Jaccardian * Connectivity of most generalist plant sp                                                                                                | 0.10     | 0.03       | 3.43    | 0.0006   | *** |
| Alien foraging efficiency * Alien mean Jaccardian * Fraction of plant sp visited by alien                                                                                                   | -0.88    | 0.54       | -1.63   | 0.1      |     |
| Alien mean Jaccardian * Connectivity of most generalist plant sp * Fraction of plant sp visited by alien                                                                                    | 0.26     | 0.12       | 2.18    | 0.029    | *   |
| Interaction among 4 predictors                                                                                                                                                              | -0.07    | 0.06       | -1.18   | 0.2      |     |
| <i>Alien effect on native pollinator density (AIC: -11619, Null/ Residual deviance: 0.027 / 0.0043 on 1199/ 1185 degrees of freedom, Dispersion parameter for gaussian family: 3.6e-06)</i> |          |            |         |          |     |
| (Intercept)                                                                                                                                                                                 | -3 e-3   | 2 e-3      | -1.51   | 0.1      |     |
| Alien foraging efficiency                                                                                                                                                                   | -0.6 e-3 | 1 e-3      | -0.52   | 0.6      |     |
| Alien mean Jaccardian index                                                                                                                                                                 | 2 e-2    | 3 e-2      | 0.69    | 0.5      |     |
| Connectivity of most generalist plant sp                                                                                                                                                    | -3 e-4   | 2 e-4      | 1.67    | 0.1      |     |

|                                                                                                                                                                                                |          |         |        |          |     |
|------------------------------------------------------------------------------------------------------------------------------------------------------------------------------------------------|----------|---------|--------|----------|-----|
| Fraction of plant sp visited by alien                                                                                                                                                          | -9.5 e-3 | 4.7 e-3 | -2.03  | 0.04     | *   |
| Alien foraging efficiency * Alien mean Jaccardian                                                                                                                                              | 3 e-4    | 1.7 e-2 | 0.02   | 1        |     |
| Alien foraging efficiency * Connectivity of most generalist plant sp                                                                                                                           | 1 e-4    | 1 e-4   | 0.61   | 0.5      |     |
| Alien foraging efficiency * Fraction of plant sp visited by alien                                                                                                                              | 2.6 e-2  | 0.2 e-2 | 12.9   | < 2 e-16 | *** |
| Alien mean Jaccardian * Connectivity of most generalist plant sp                                                                                                                               | -3 e-3   | 4 e-3   | -0.7   | 0.48     |     |
| Alien mean Jaccardian * Fraction of plant sp visited by alien                                                                                                                                  | -1.1 e-1 | 0.7 e-2 | -1.6   | 0.1      |     |
| Connectivity of most generalist plant sp * Fraction of plant sp visited by alien                                                                                                               | -2 e-3   | 0.4 e-3 | -5.2   | 2 e-7    | *** |
| Alien foraging efficiency * Alien mean Jaccardian * Connectivity of most generalist plant sp                                                                                                   | 0.3 e-4  | 2 e-3   | 0.15   | 0.9      |     |
| Alien foraging efficiency * Alien mean Jaccardian * Fraction of plant sp visited by alien                                                                                                      | 1.9 e-2  | 3.6 e-2 | 0.5    | 0.6      |     |
| Alien mean Jaccardian * Connectivity of most generalist plant sp * Fraction of plant sp visited by alien                                                                                       | 1.5 e-2  | 0.8 e-2 | 1.8    | 0.07     |     |
| Interaction among 4 predictors                                                                                                                                                                 | -4 e-3   | 4 e-3   | -0.96  | 0.34     |     |
| <b><i>Alien effect on native plant density (AIC: -14201, Null/ Residual deviance: 0.0011 / 0.0005 on 1199/1192 degrees of freedom. Dispersion parameter for gaussian family: 4.2 e-07)</i></b> |          |         |        |          |     |
| (Intercept)                                                                                                                                                                                    | -3 e-3   | 6 e-4   | -4.57  | 5 e-06   | *** |
| Alien foraging efficiency                                                                                                                                                                      | 3 e-3    | 3 e-4   | 8.20   | 6 e-16   | *** |
| Alien density                                                                                                                                                                                  | -2 e-4   | 4 e-1   | 0.00   | 1.00     |     |
| Fraction of specialist native pollinator sp                                                                                                                                                    | 2 e-3    | 7 e-4   | 3.42   | 0.0006   | *** |
| Alien foraging efficiency * Alien density                                                                                                                                                      | -1 e-4   | 2 e-1   | -0.001 | 1.00     |     |
| Alien foraging efficiency * Fr. of specialist native pollinator sp                                                                                                                             | -2 e-3   | 5 e-4   | -4.65  | 4 e-6    | *** |
| Interaction among 3 predictors                                                                                                                                                                 | -2 e-7   | 6 e-5   | -0.003 | 1.00     |     |

Models were fit on data from independent introduction trials over 1200 networks (600 each for average and efficient alien foragers, consisting of 100 nested and 100 non-nested networks for each richness/connectance combination: 40/0.3, 90/0.15, 200/0.06 here tested, see Methods in main text). Only the best model (based on AIC) is shown for each effect. Significance codes for P-values: 0 '\*\*\*', 0.001 '\*\*', 0.01 '\*',
